# Supplementary material for: A concise synthesis of 2-(2-aminothiophene)-benzimidazoles by one-pot multicomponent reaction
Source: Royal Society of Chemistry journal article supplement (doi:10.1039/c3ra41545g), 2013-01-01

## Supporting Information

### A Concise Synthesis of 2-(2-Aminothiophene)-benzimidazoles by One Pot Multicomponent Reaction

Ying-Sheng Chuang, Bharat D. Narhe, Li-Hseuh Chen and Chung-Ming Sun\*

Department of Applied Chemistry, National Chiao-Tung University, Hsinchu 300, Taiwan, ROC

E-mail: [cmsun@mail.nctu.edu.tw](mailto:cmsun@mail.nctu.edu.tw).

(i) General Experimental Methods.

(ii) Copies of  $^1\text{H}$  and  $^{13}\text{C}$  NMR spectra for compounds **4a-4t**.

#### General Experimental Methods:

$^1\text{H}$  and  $^{13}\text{C}$  NMR spectra were obtained on a Bruker DX-300 FTNMR spectrometer. Chemical shifts are expressed in parts per million ( $\delta$ ) relative to, TMS (as an internal standard) signal at  $\delta$  0.00 and the central  $\text{CDCl}_3$  resonance at  $\delta$  77.0 respectively. IR spectra of liquids were recorded as thin films and of solids as KBr pellets on a HORIBA FT-720 FREEEXACT-II IR FTIR Spectrometer. HRMS analyses were performed on a JEOL TMS-HX 110 mass spectrometer. Column chromatography was performed on silica gel using mixtures of Hexanes and Ethyl acetate as eluting solvent. Analytical thin-layer chromatography (TLC) was performed with 0.25 mm silica gel-coated Kieselgel 60 F254 plates.

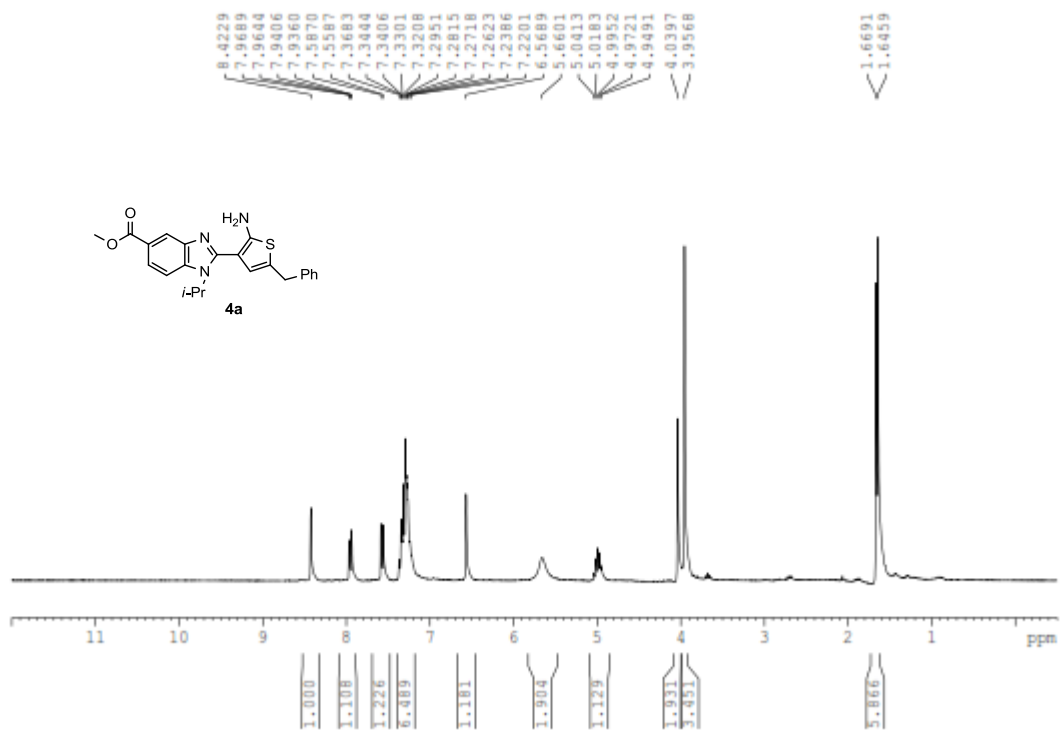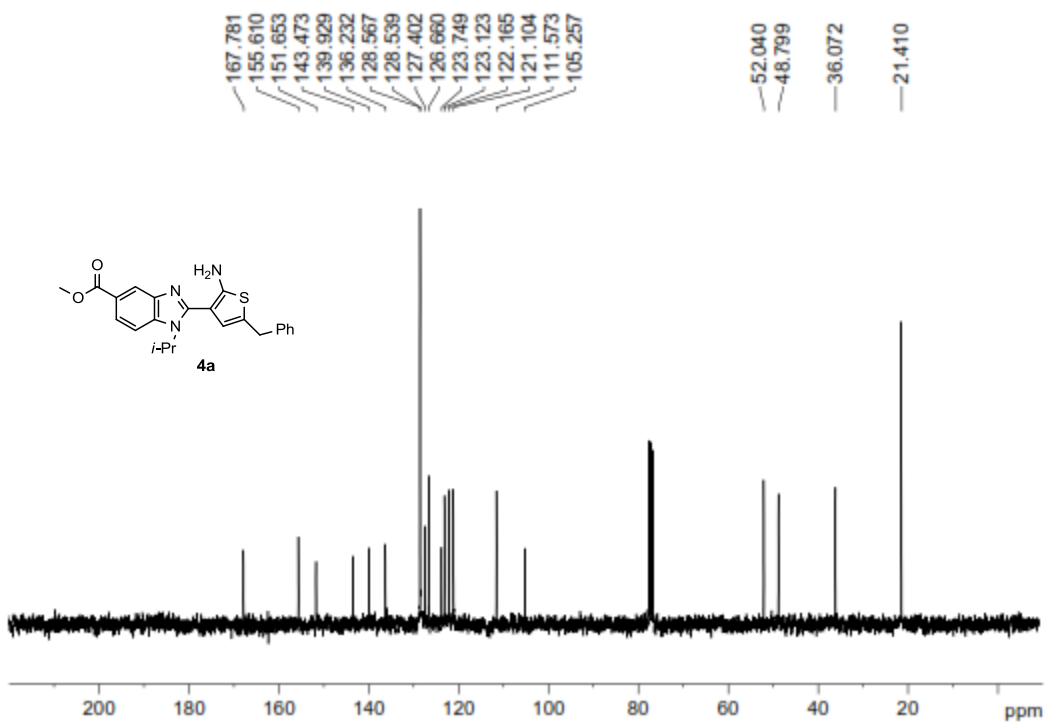

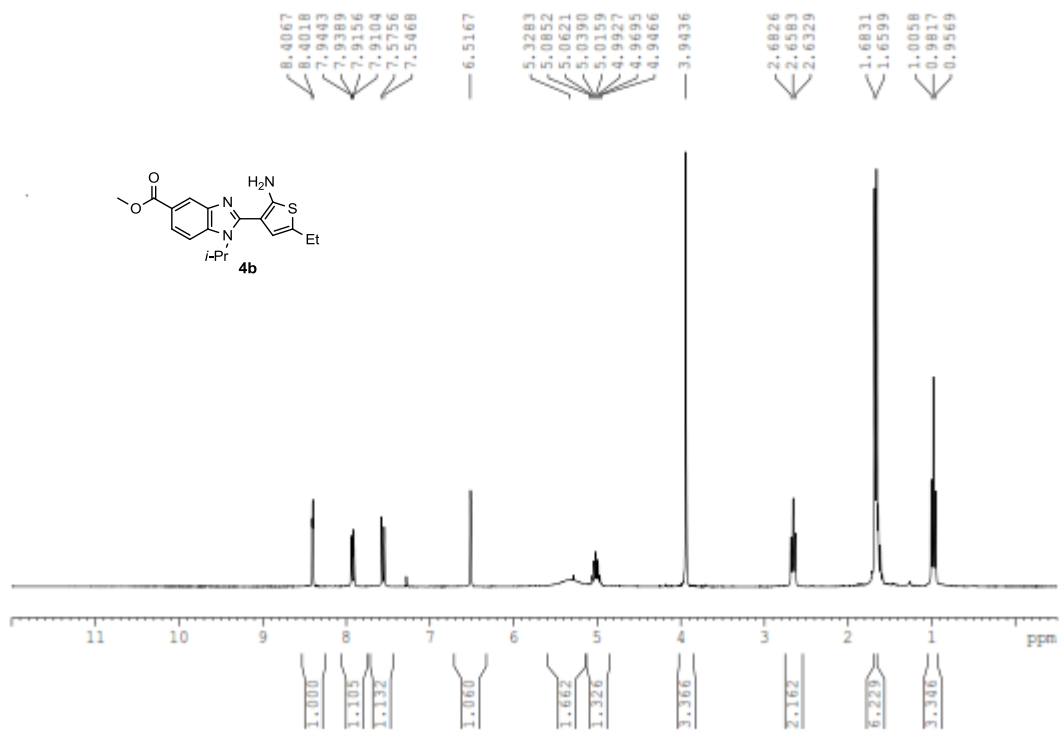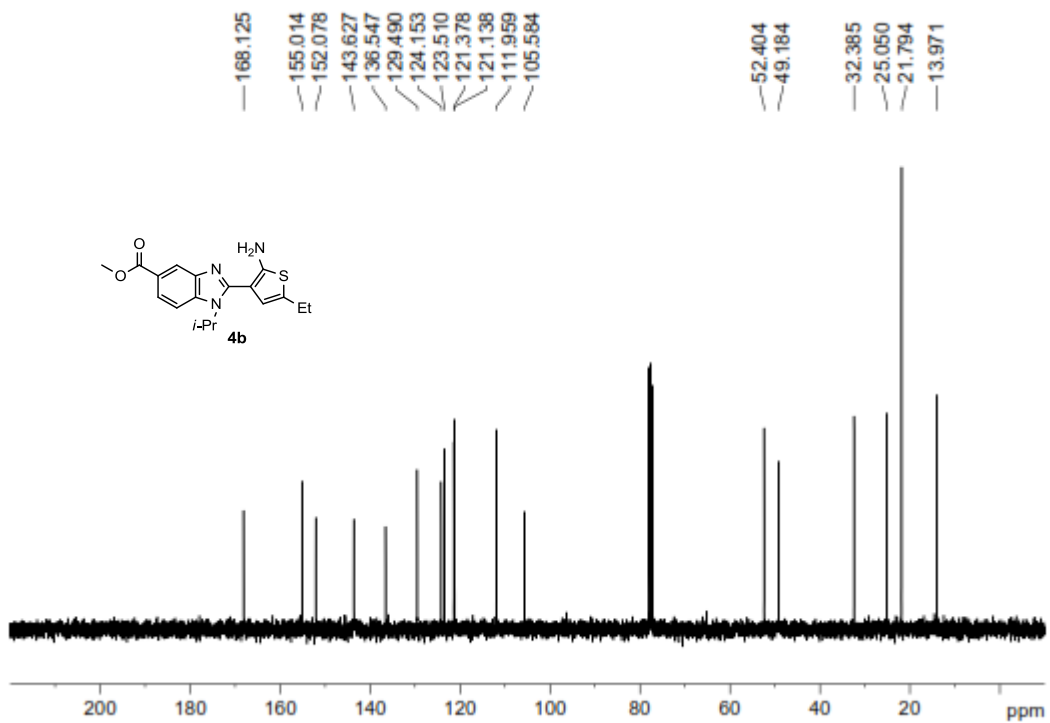

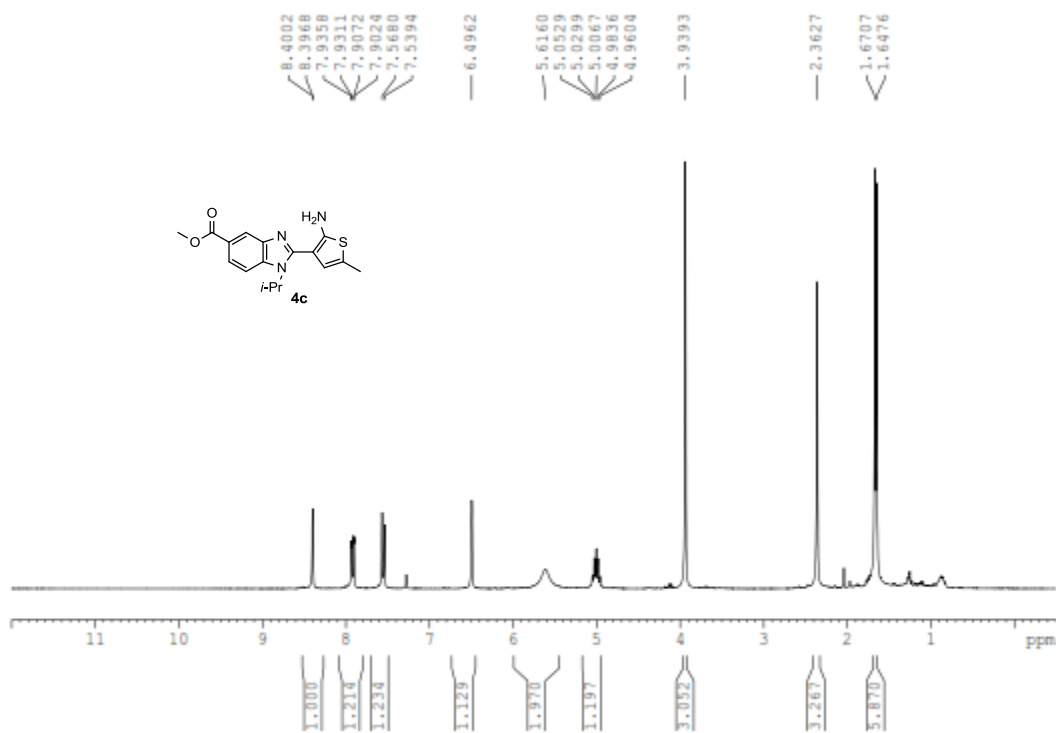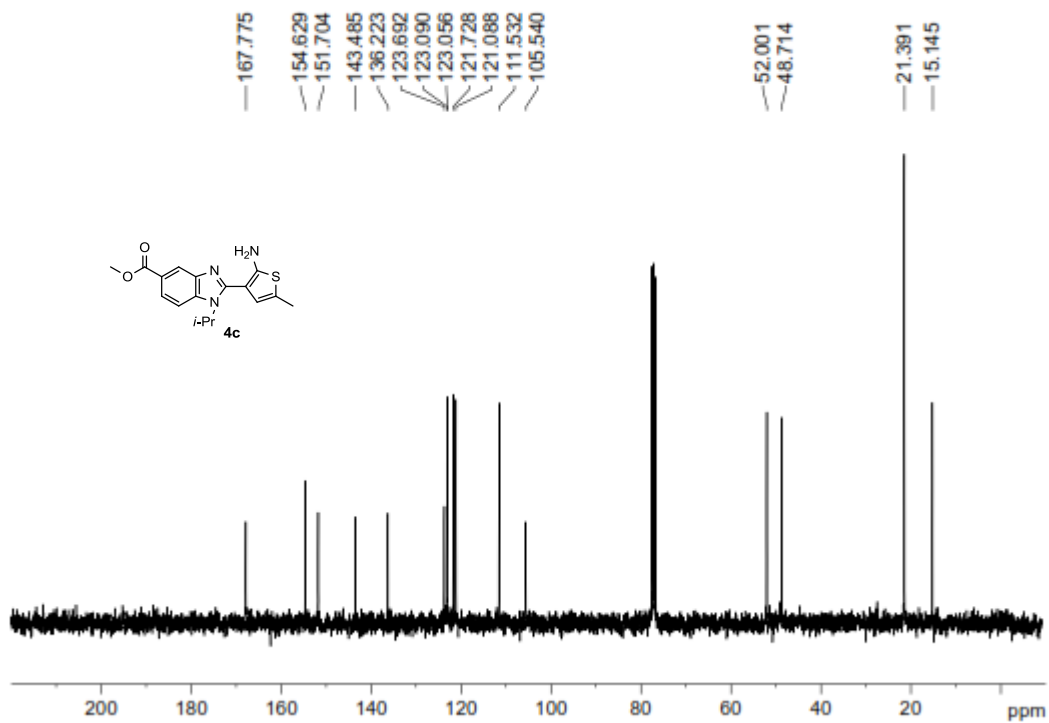

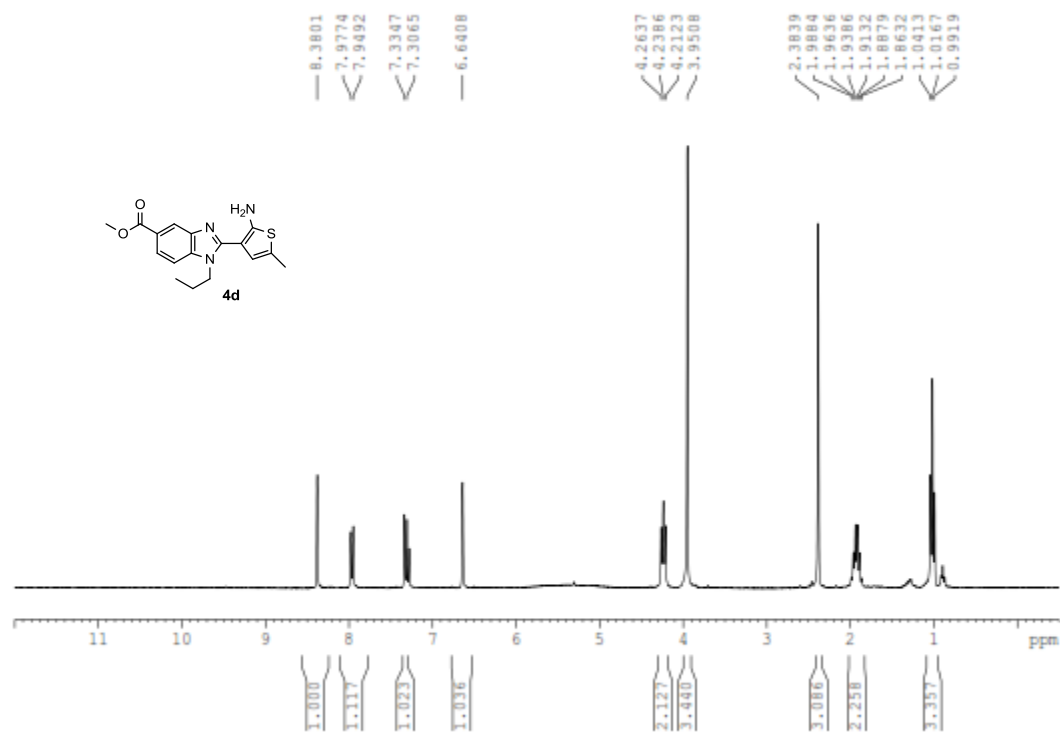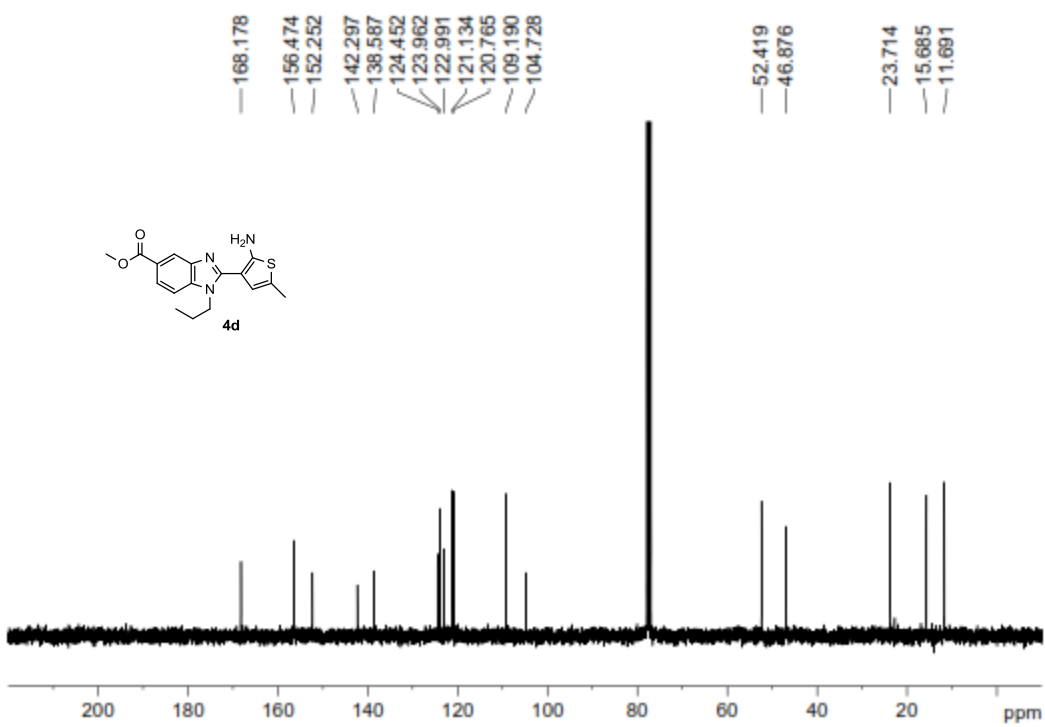

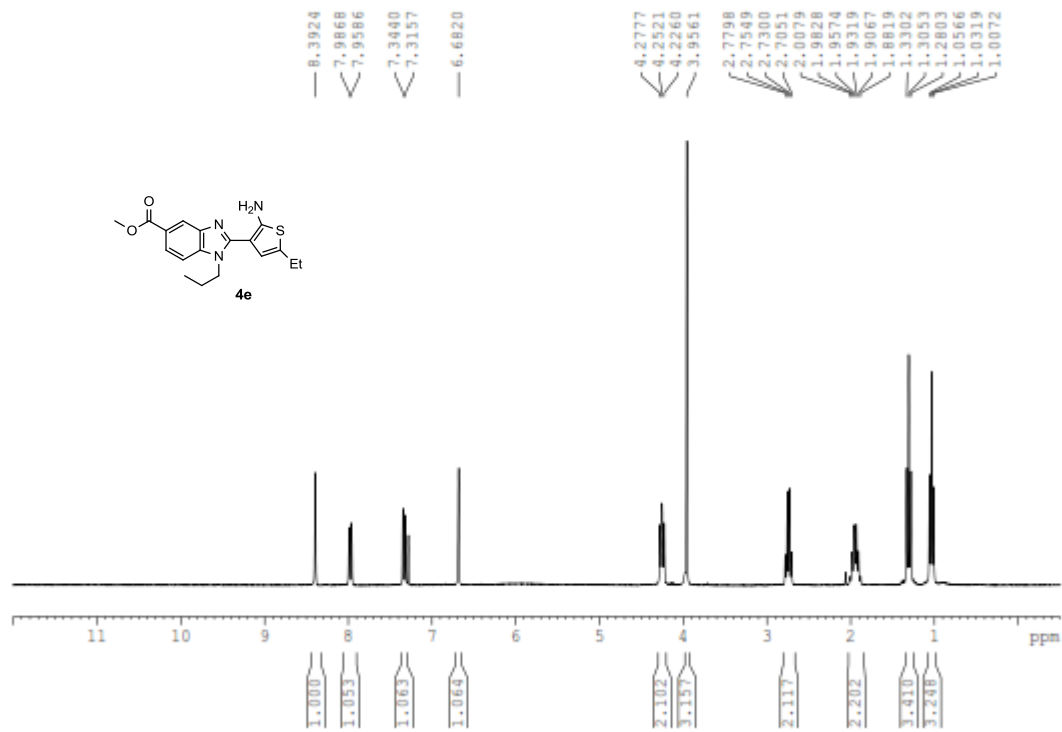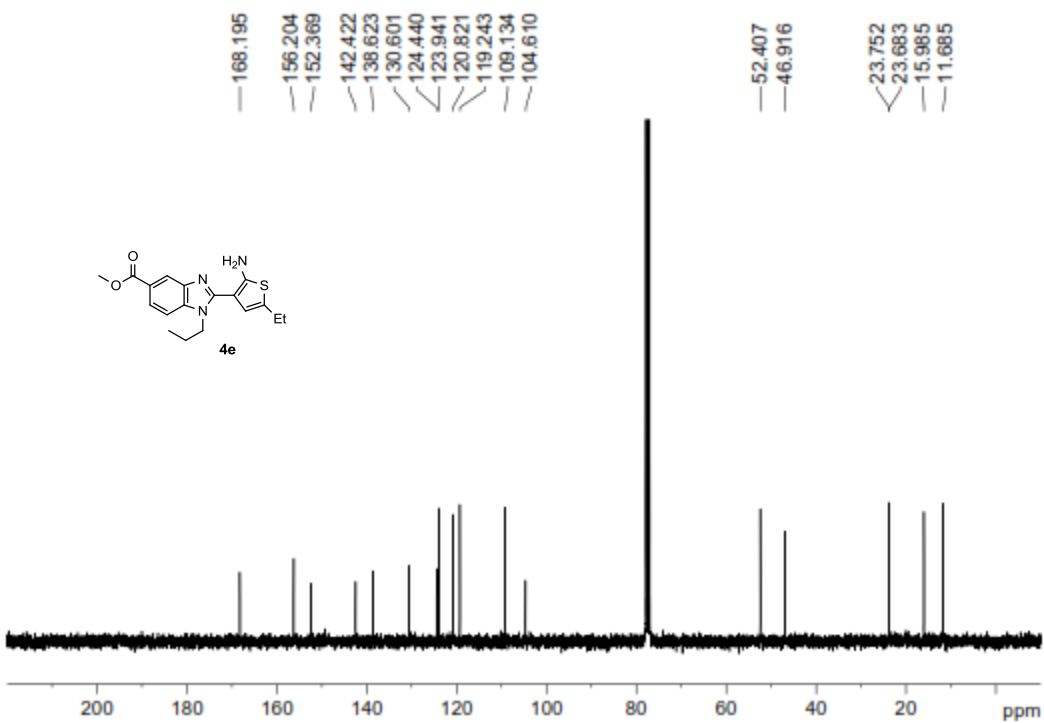

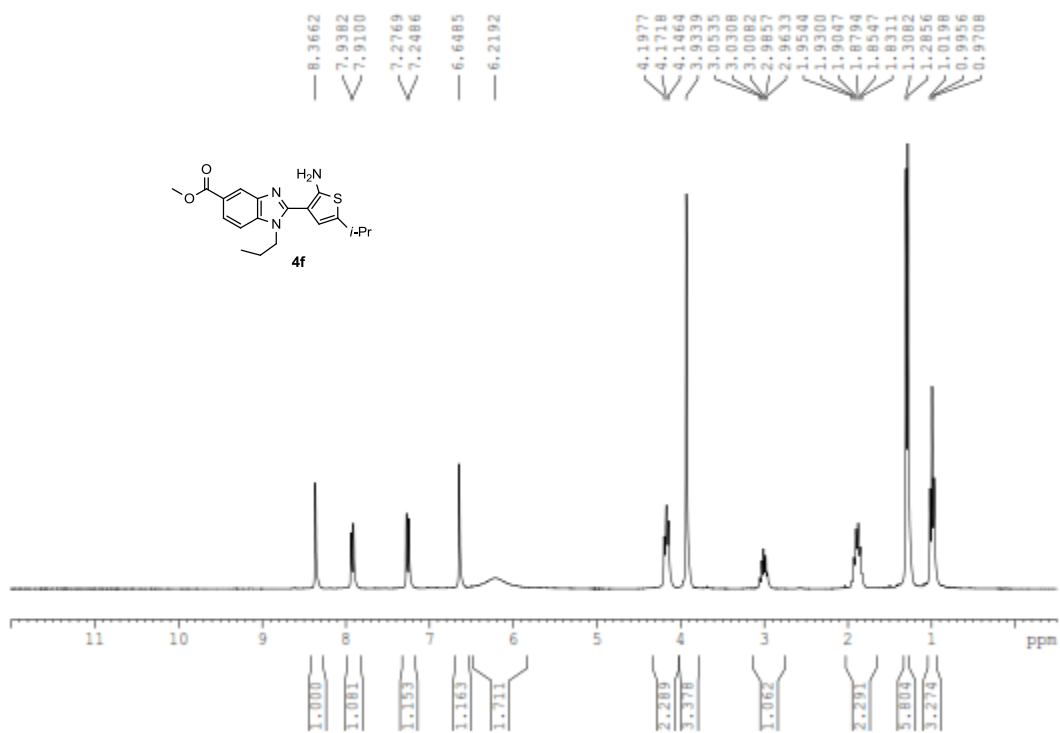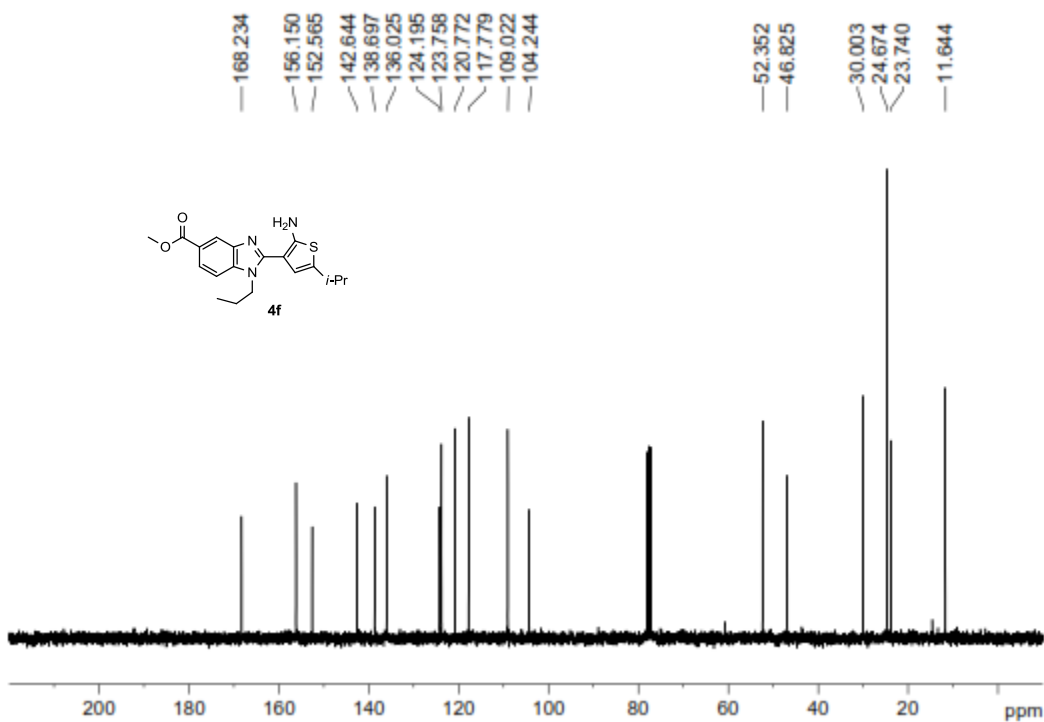

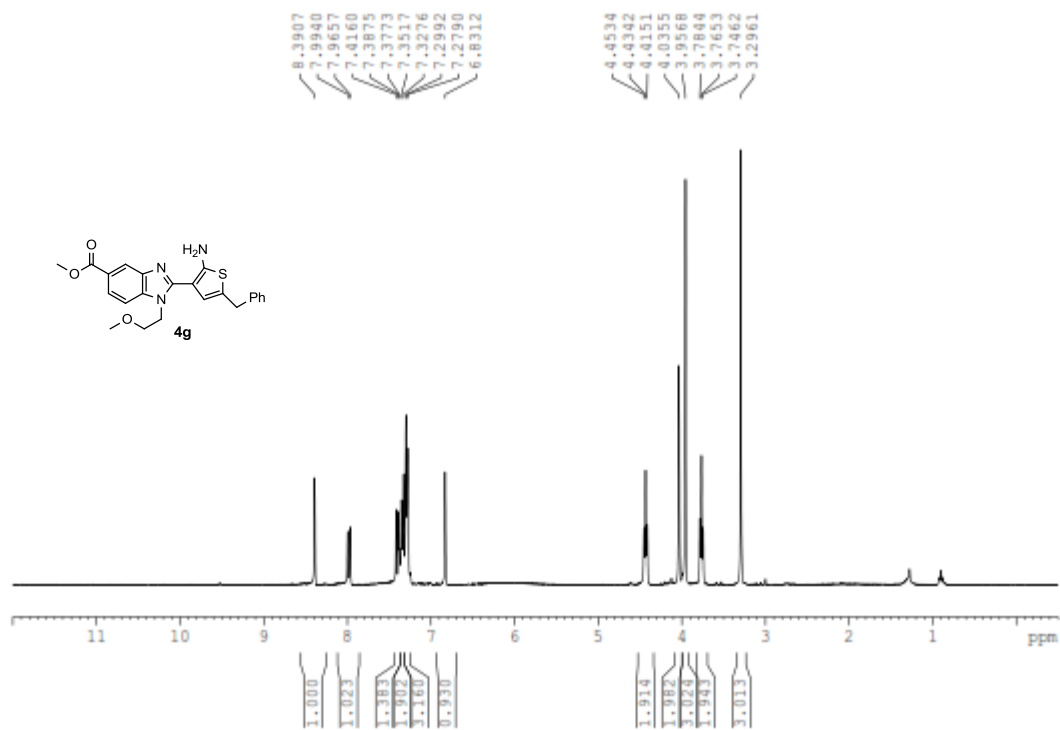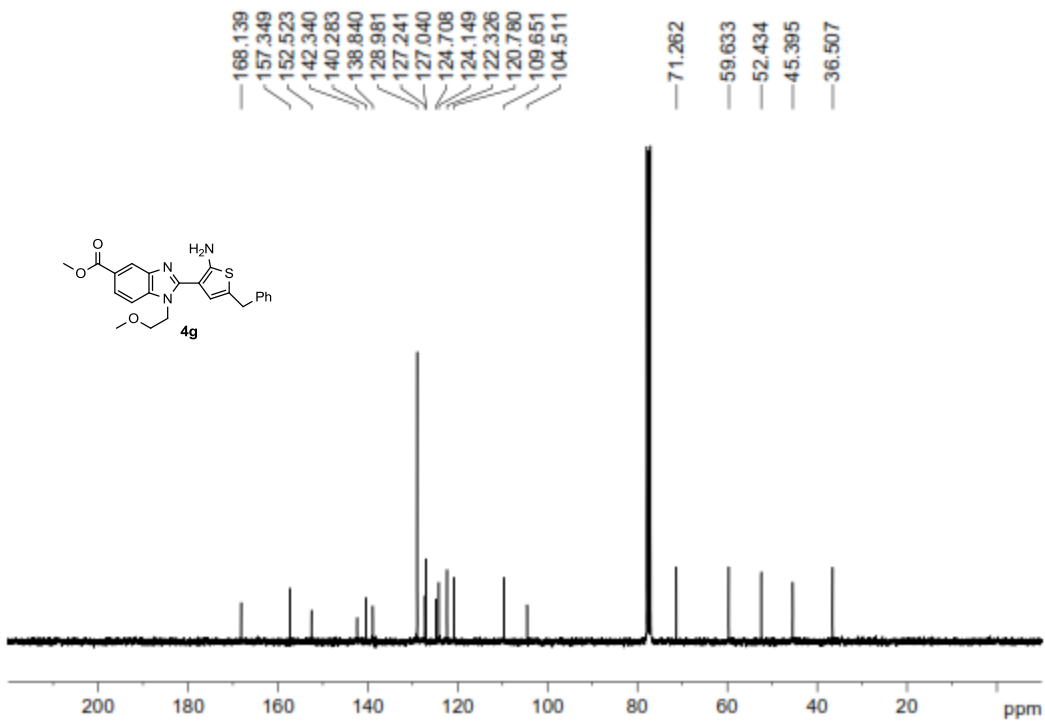



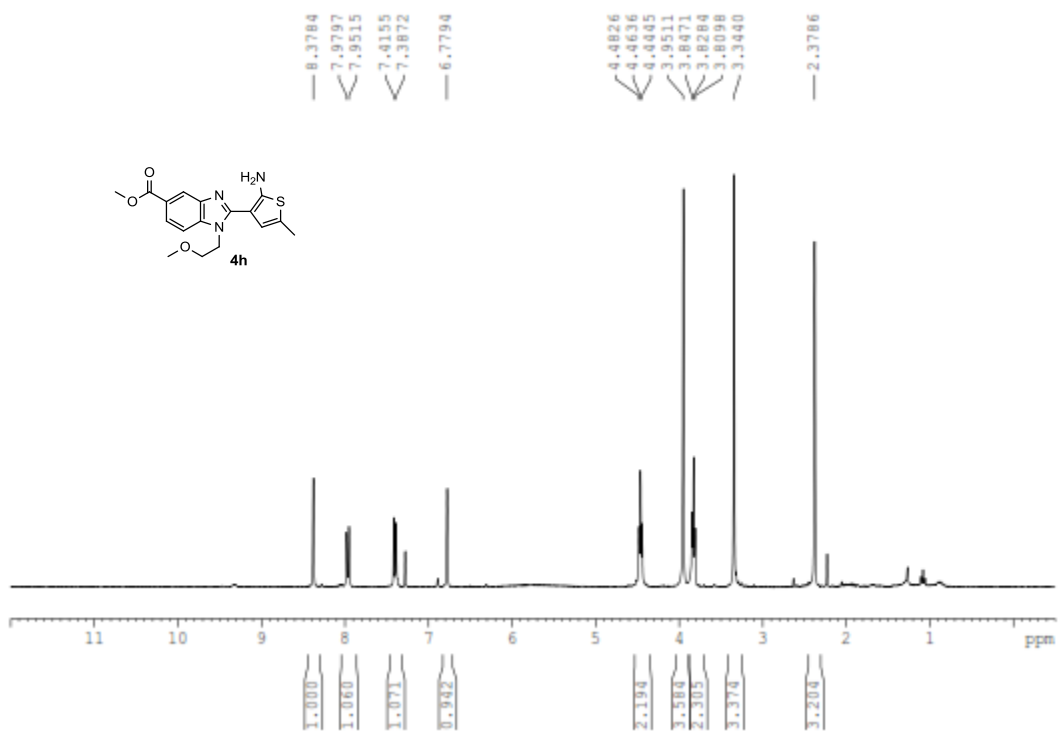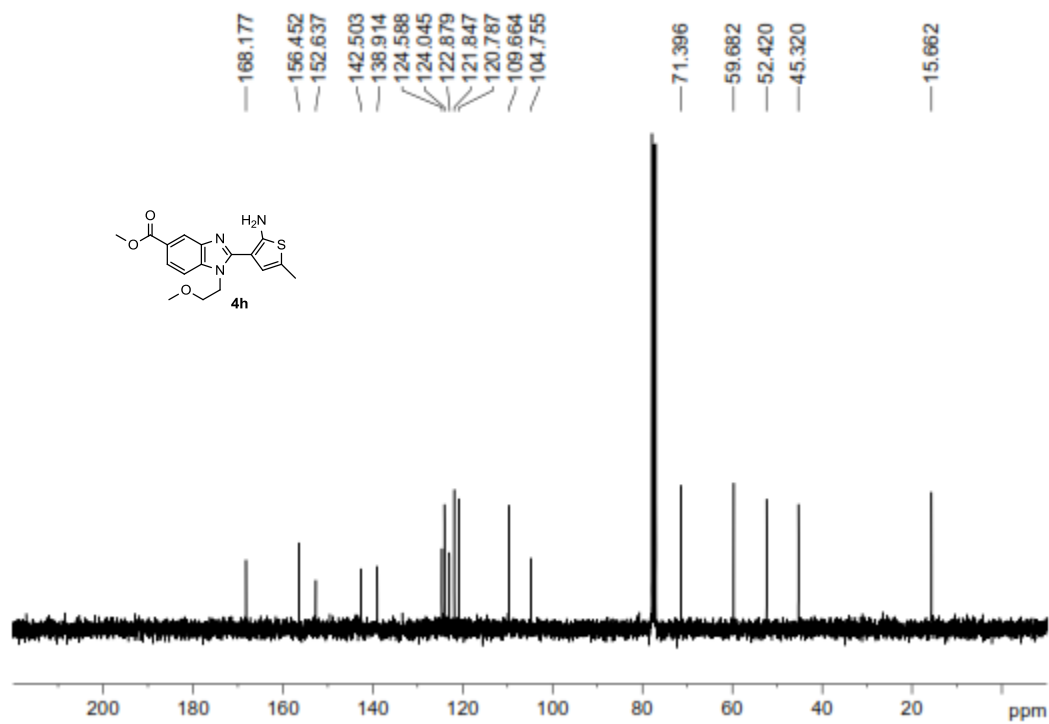

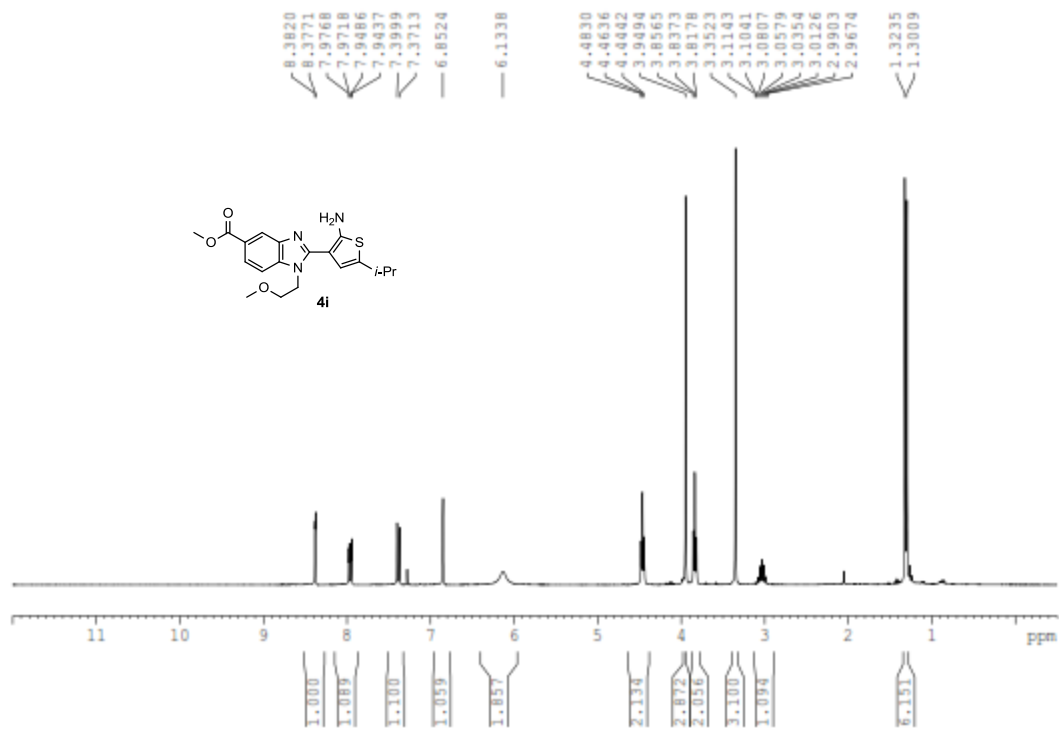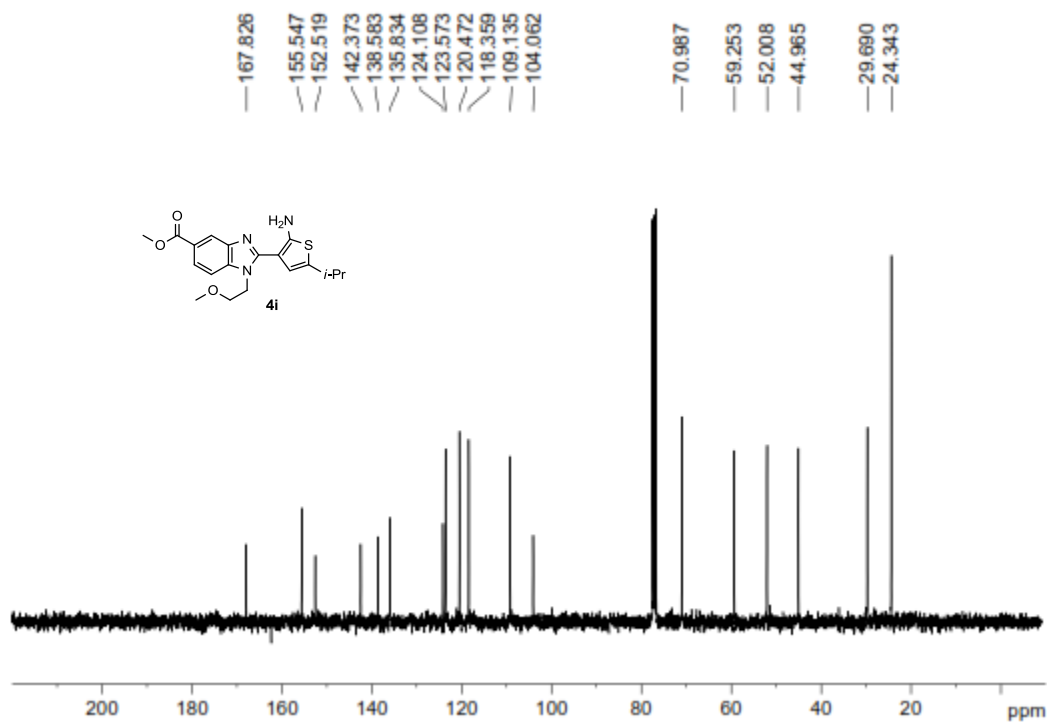

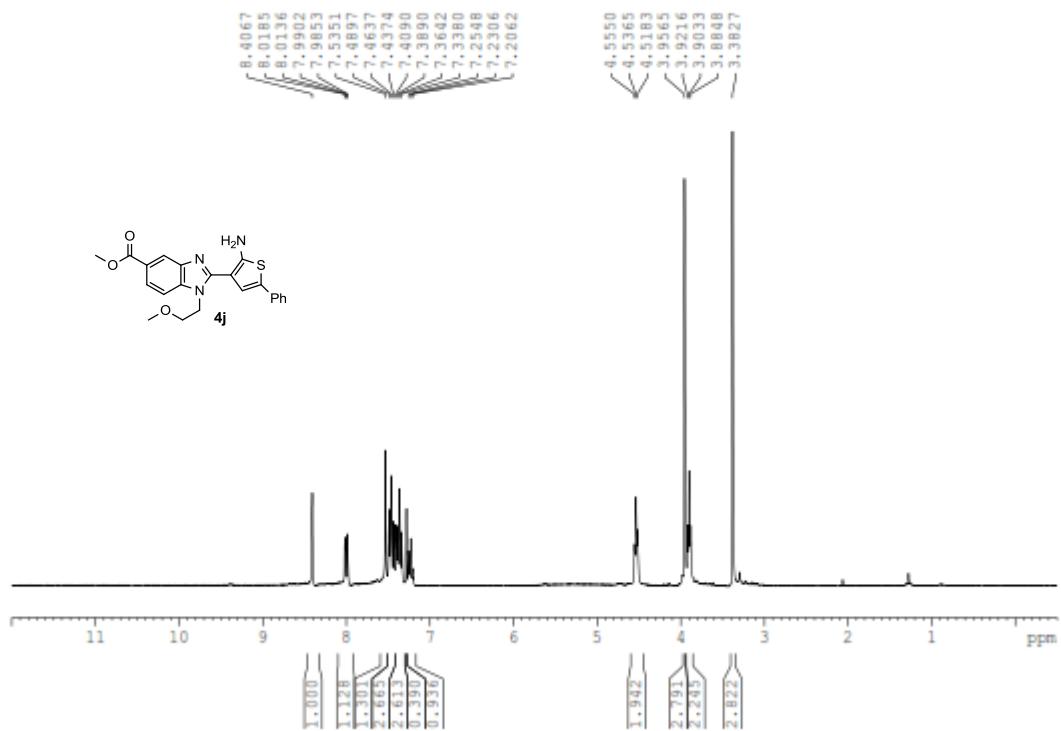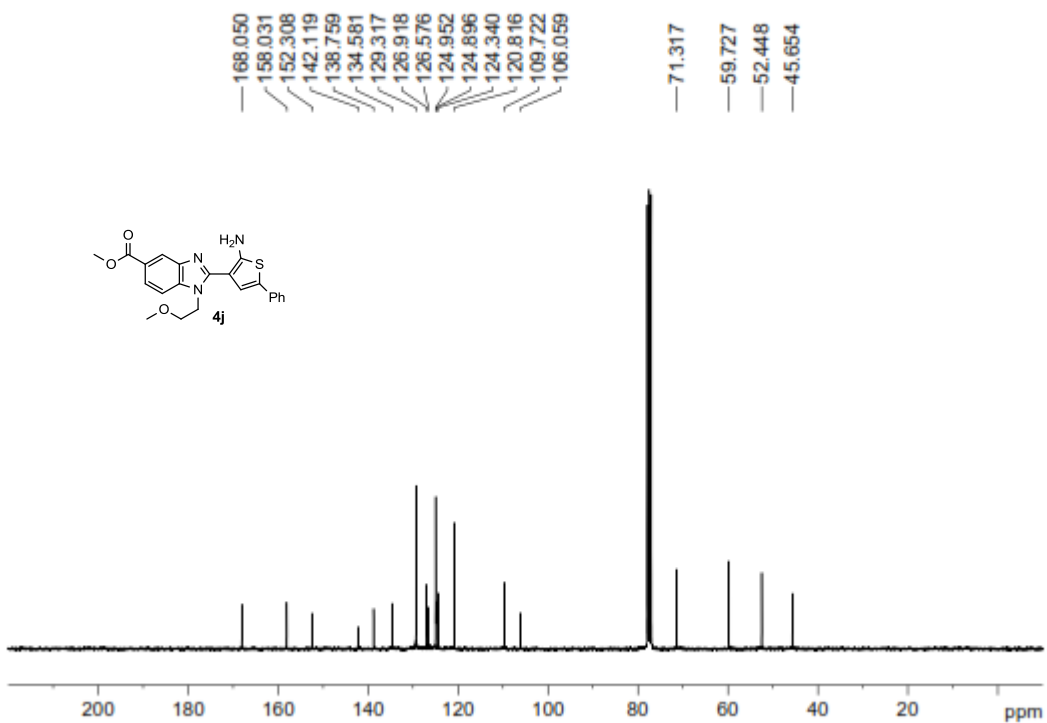

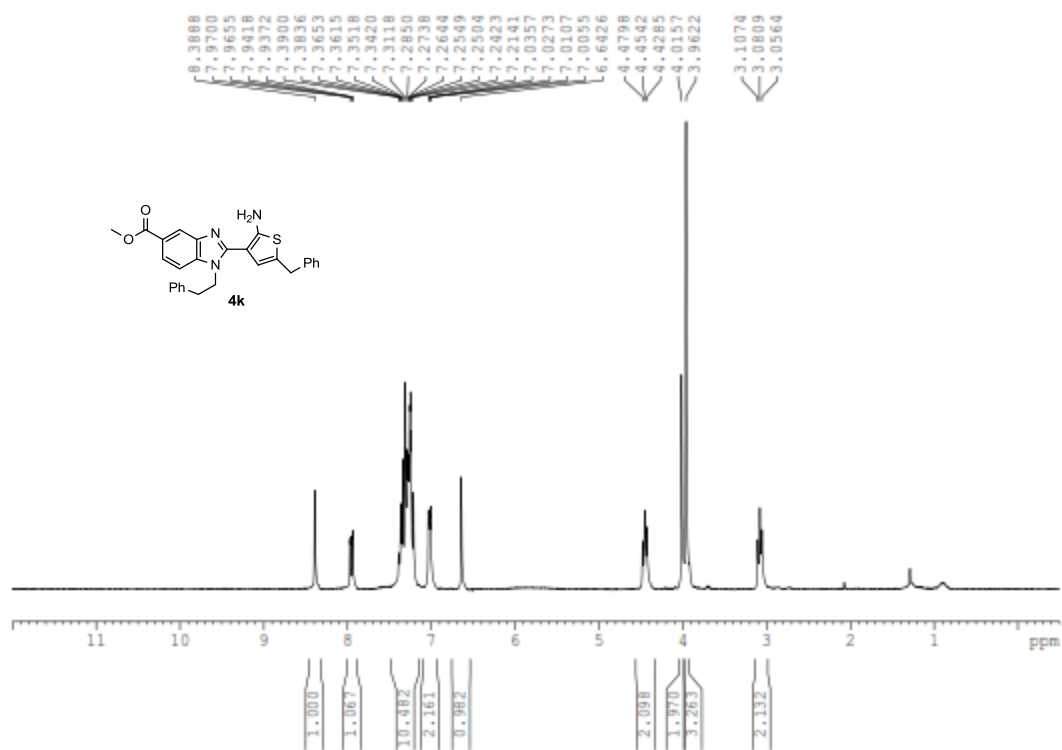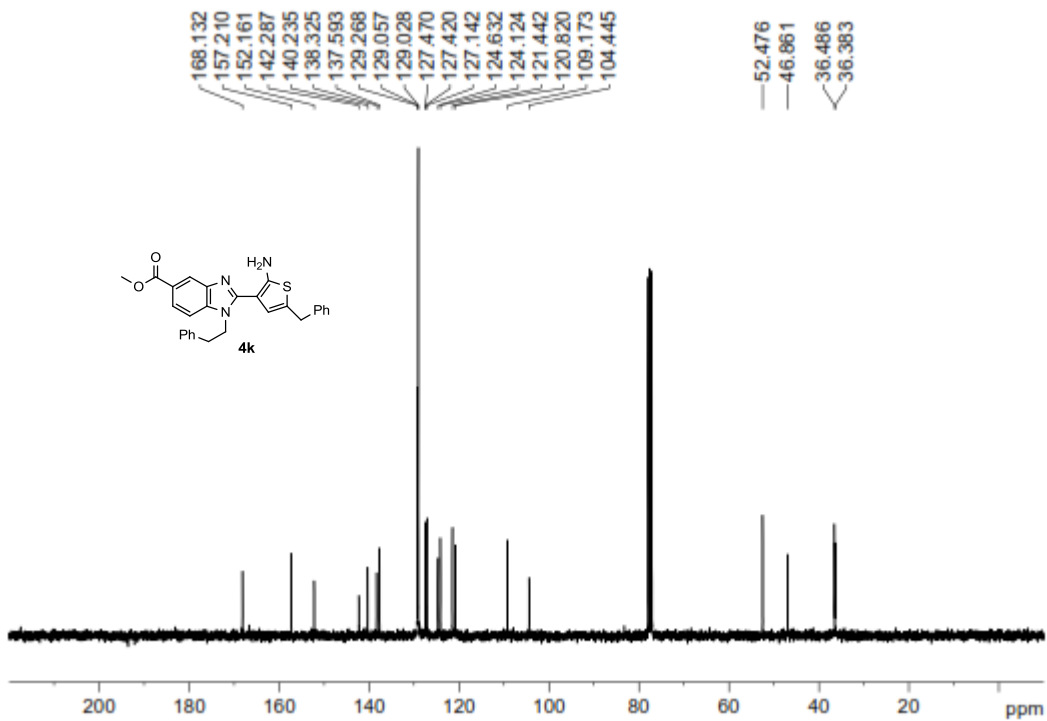

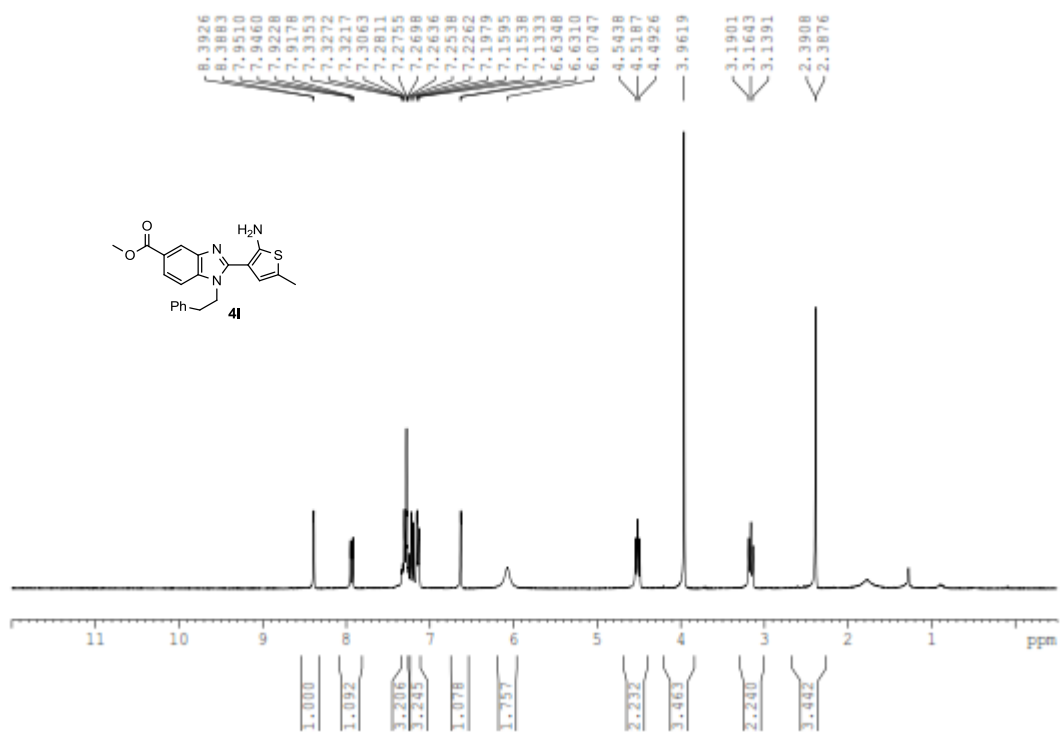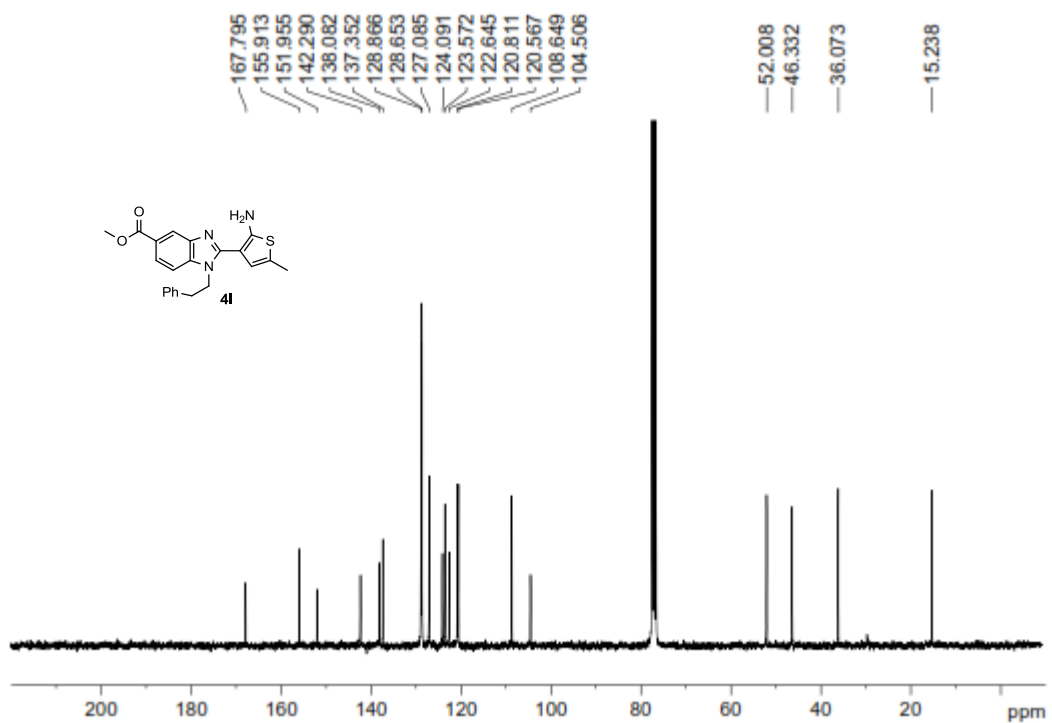

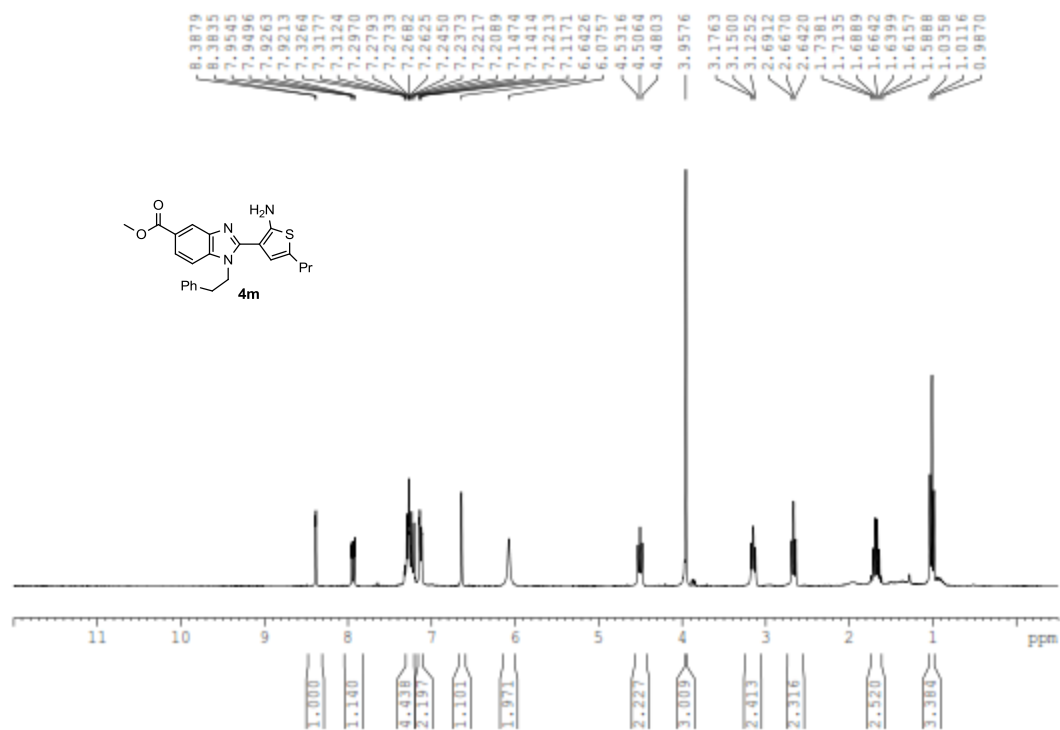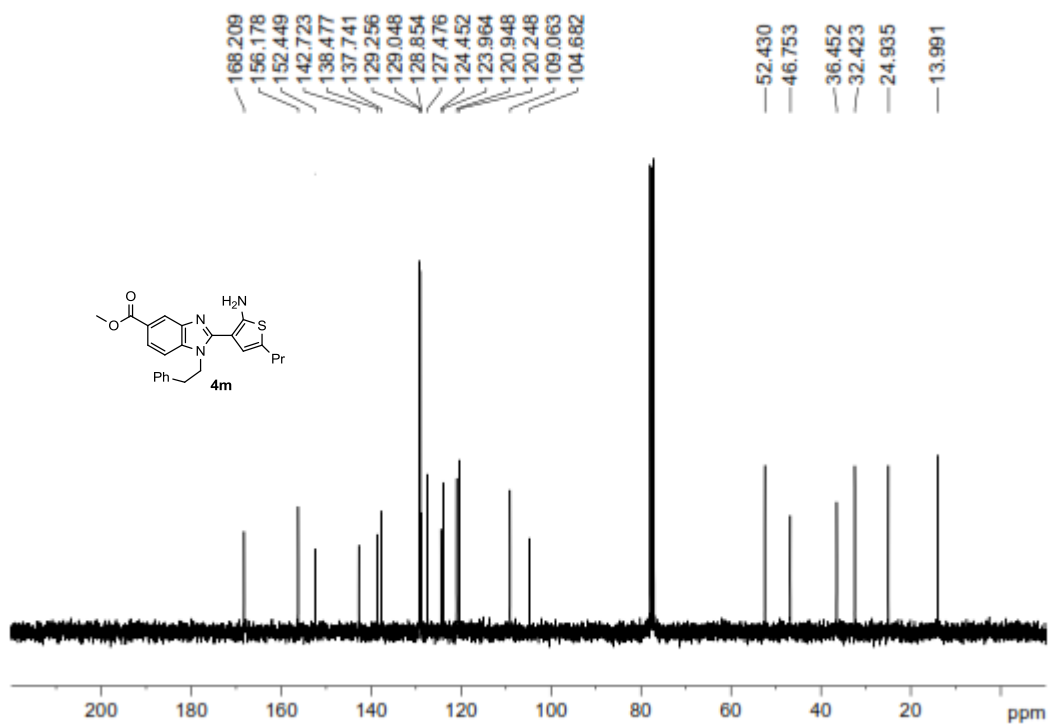

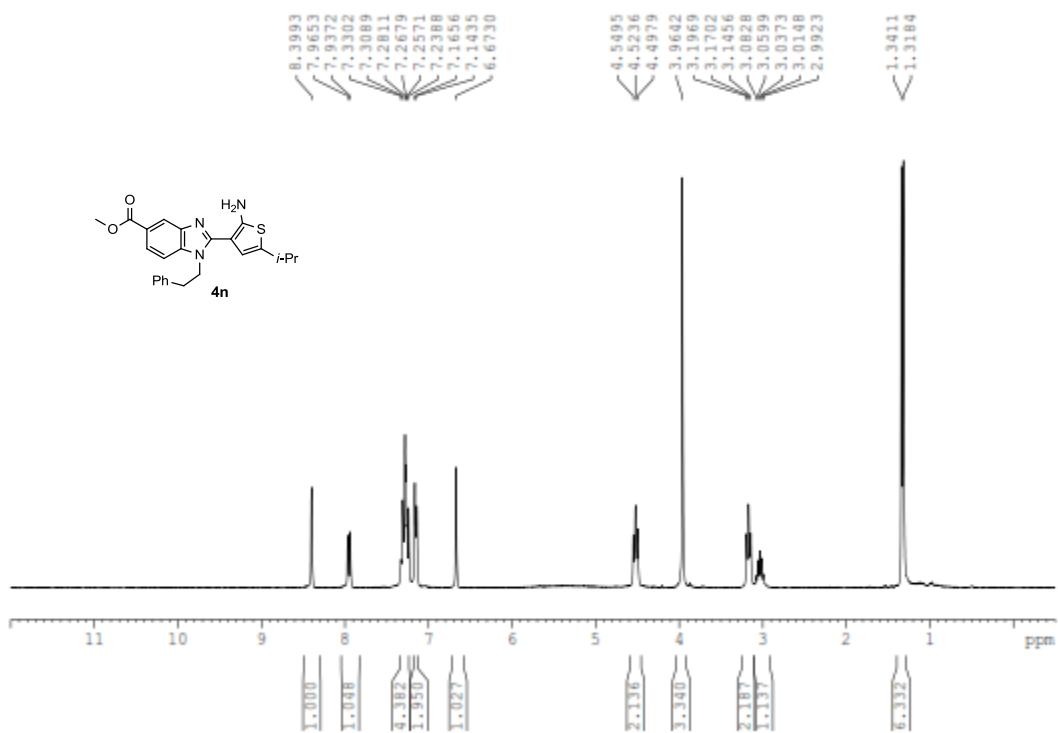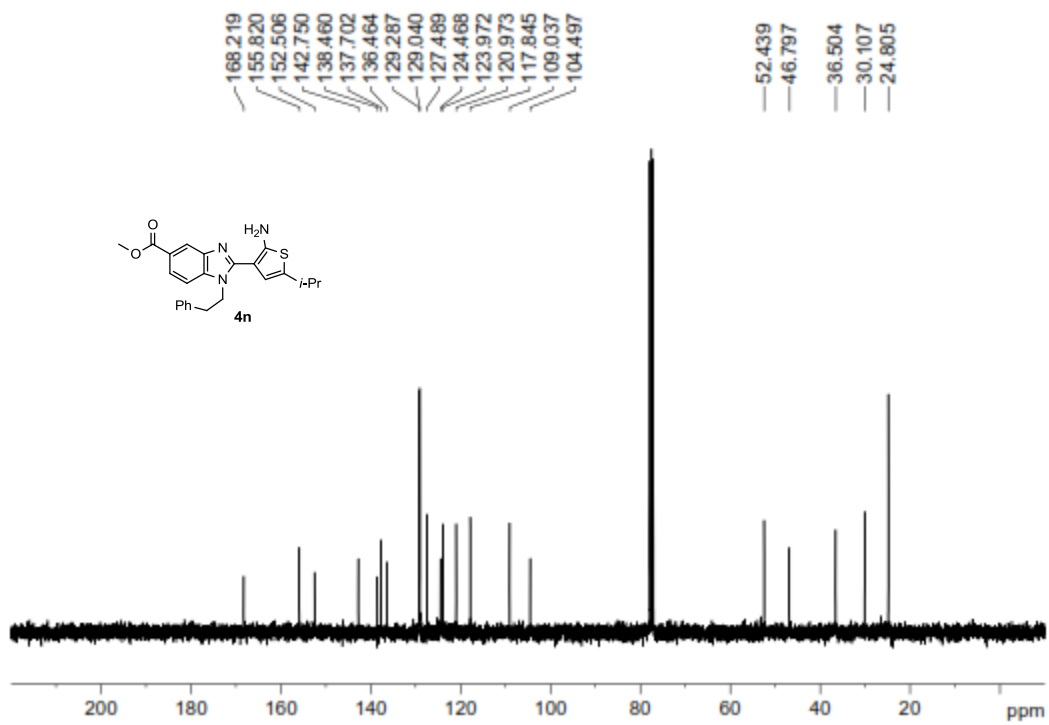

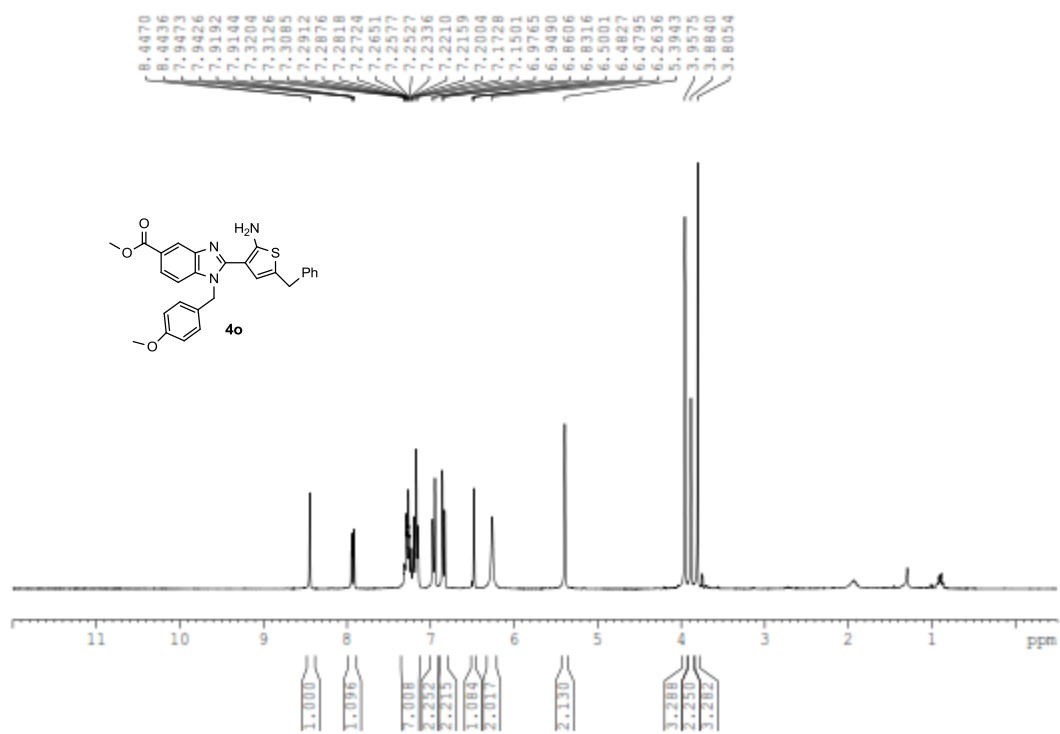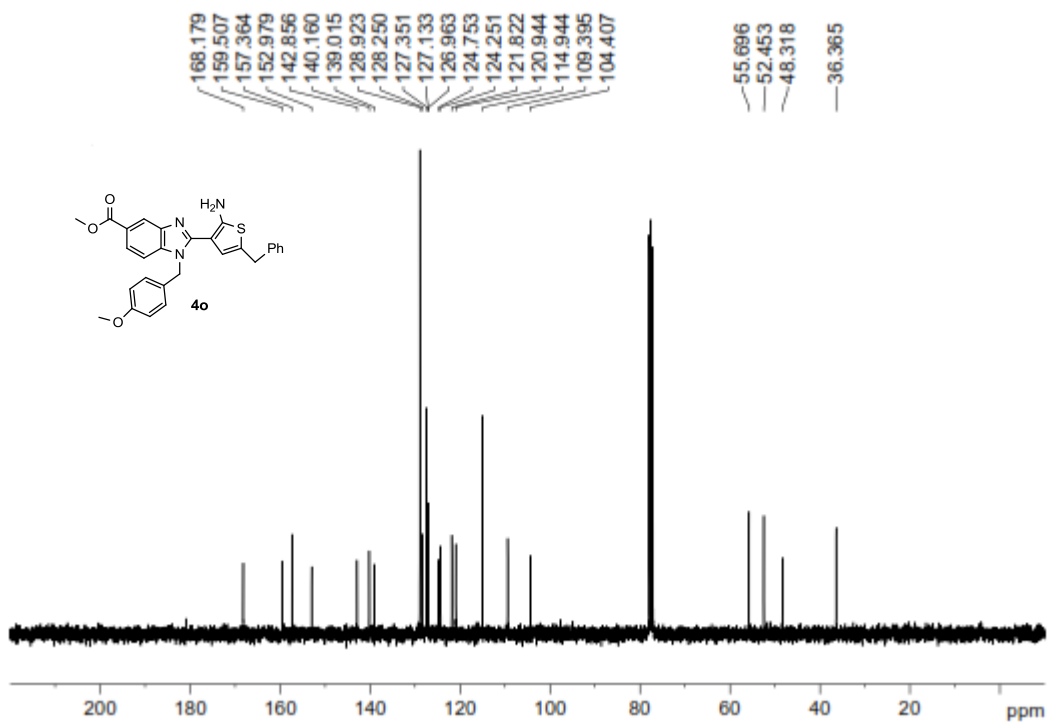



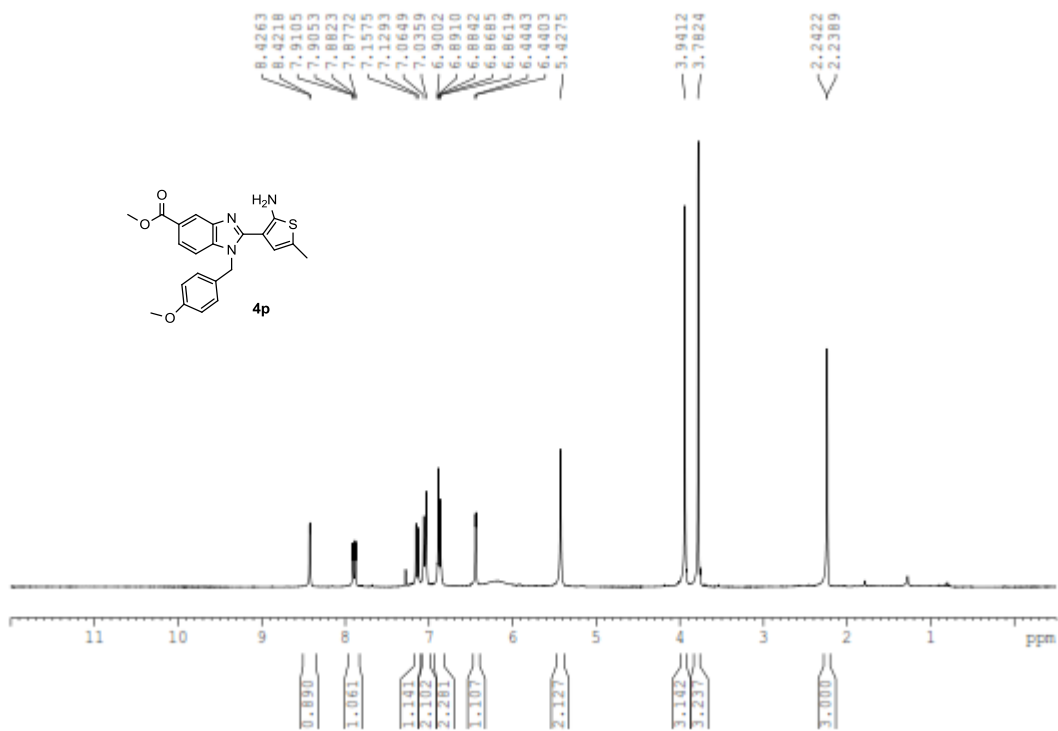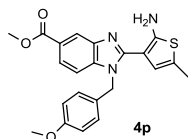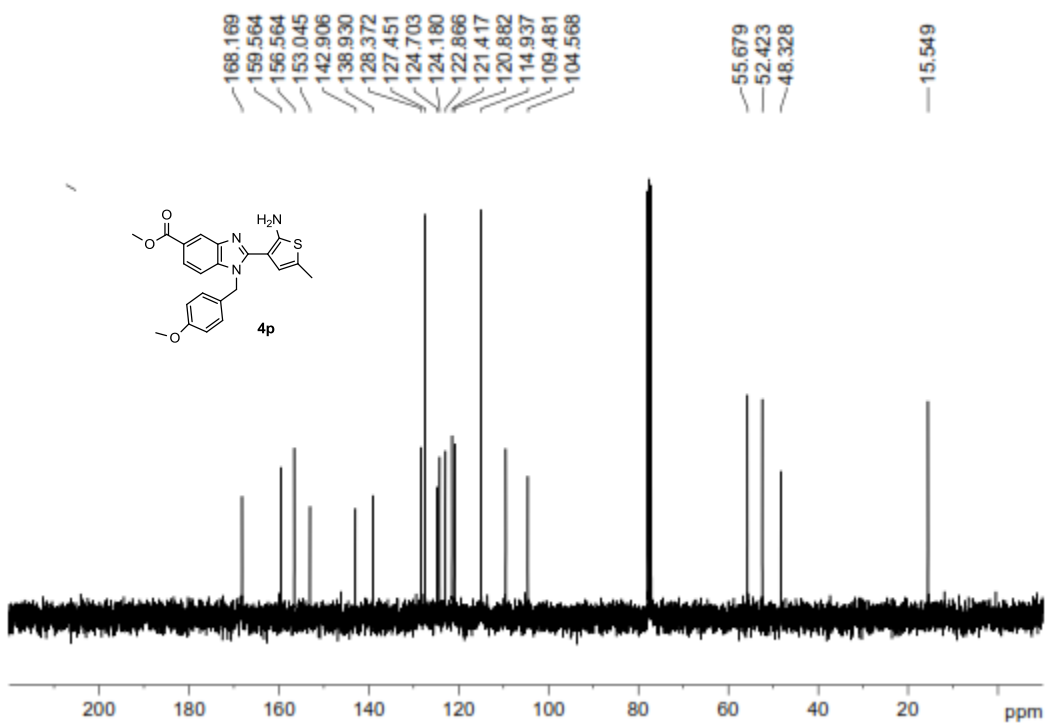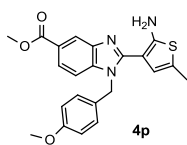

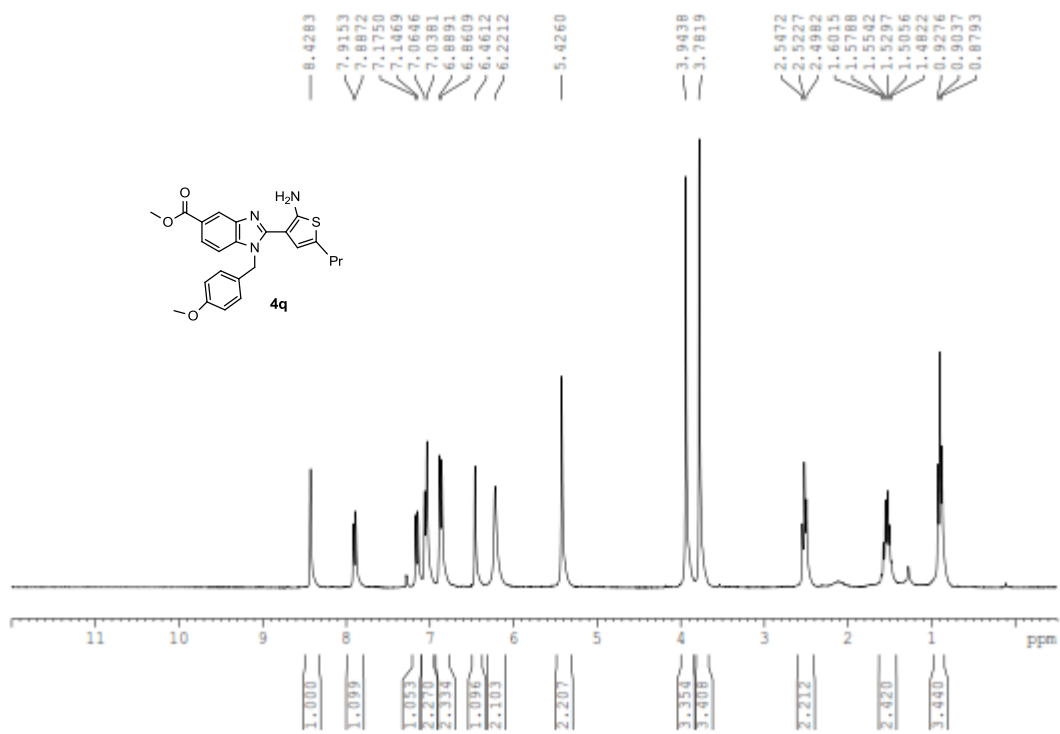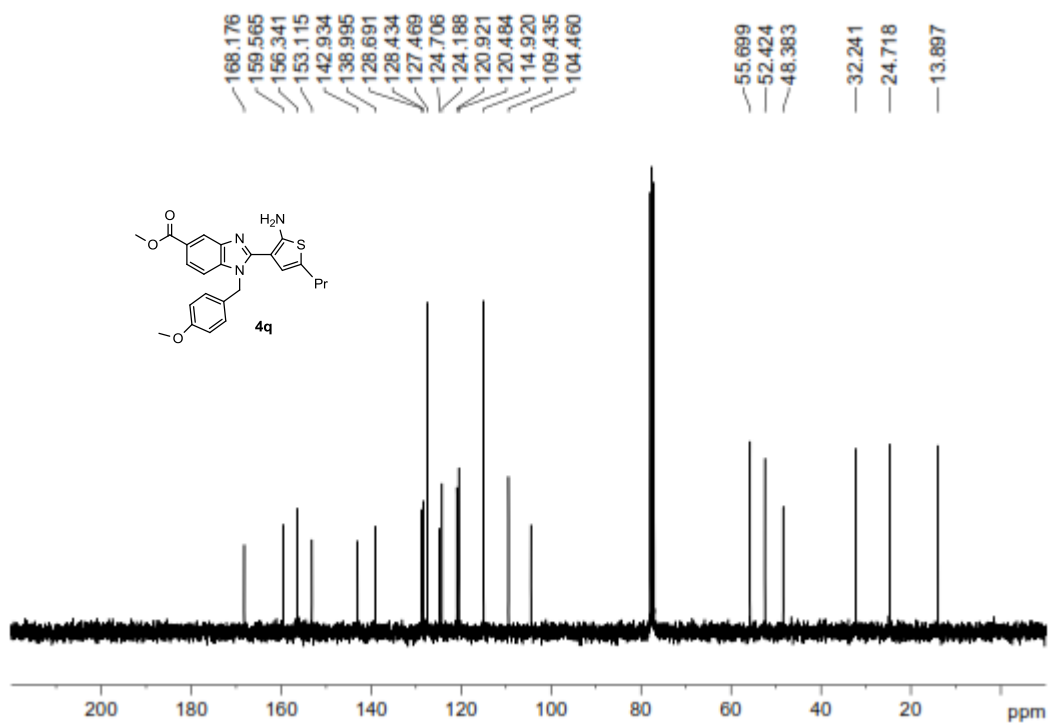

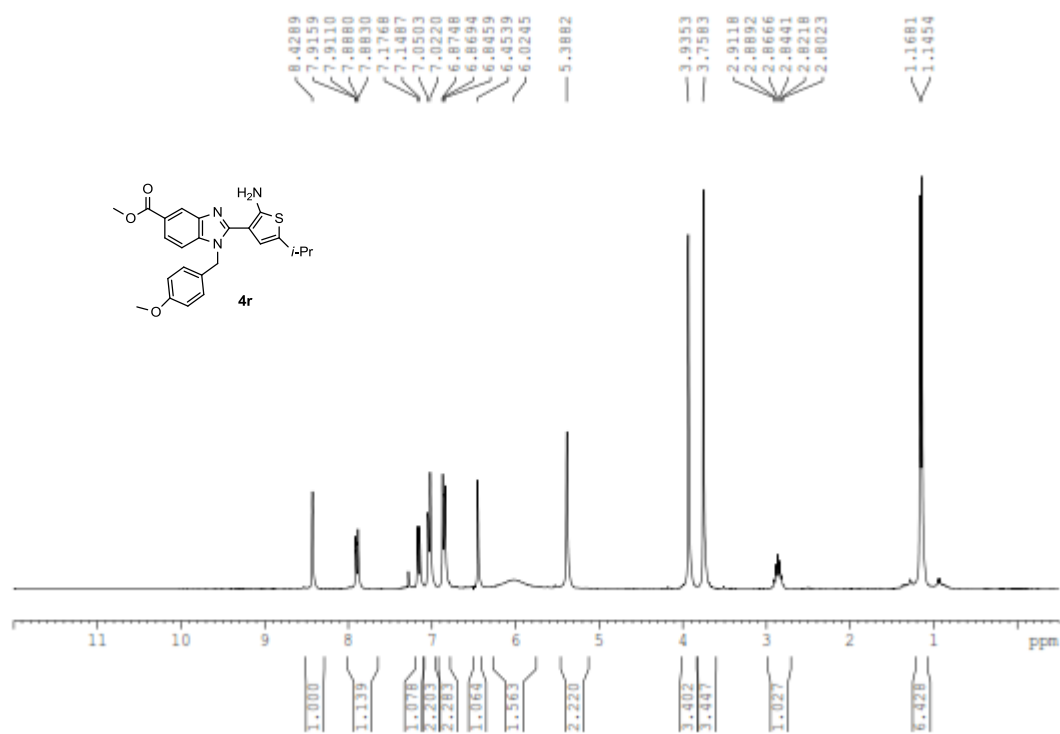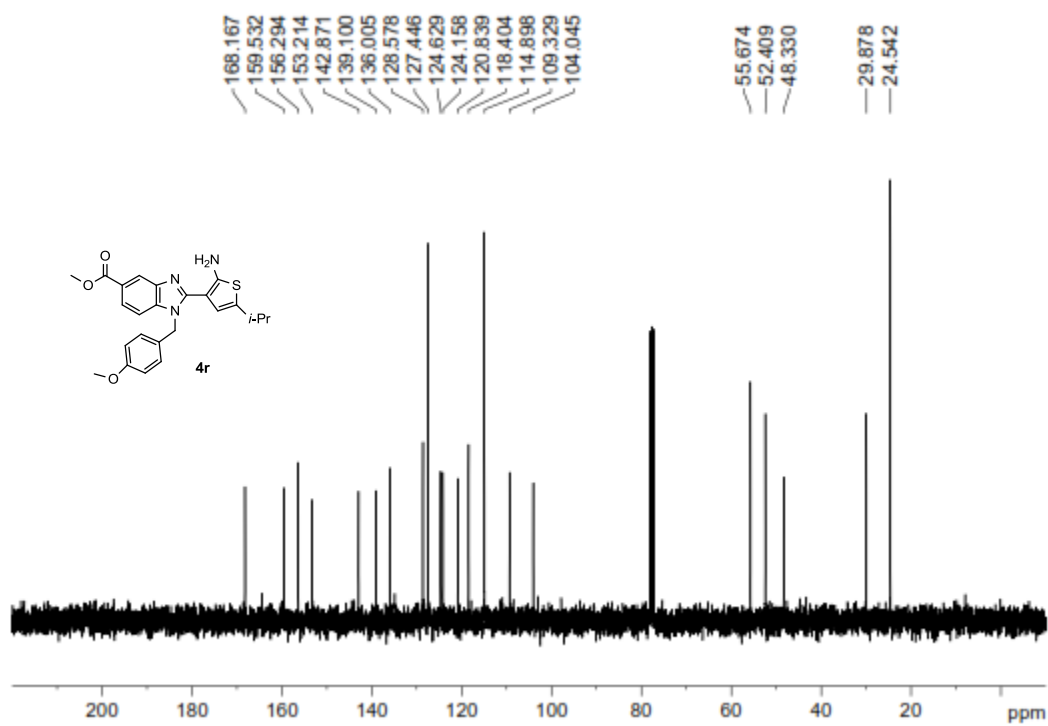

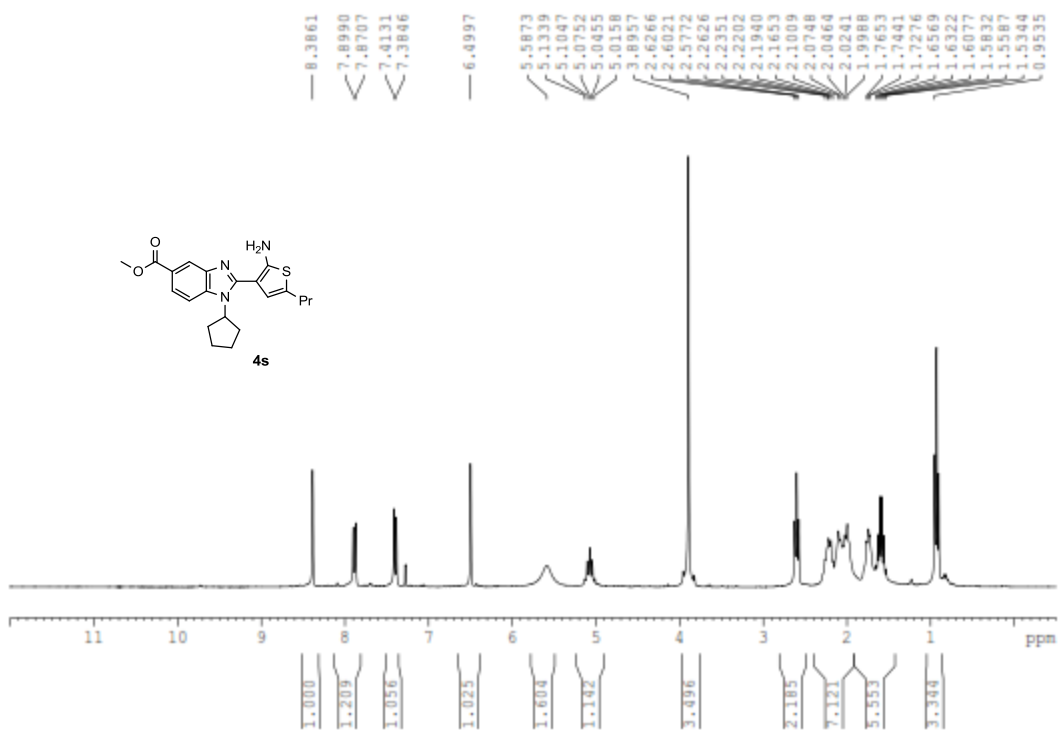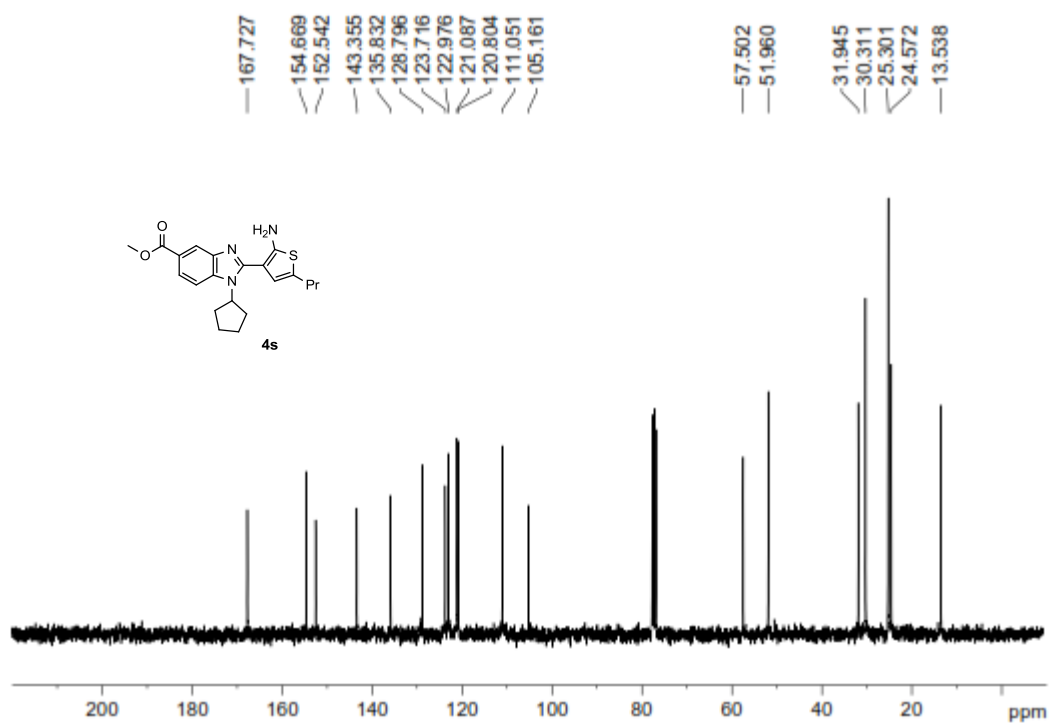

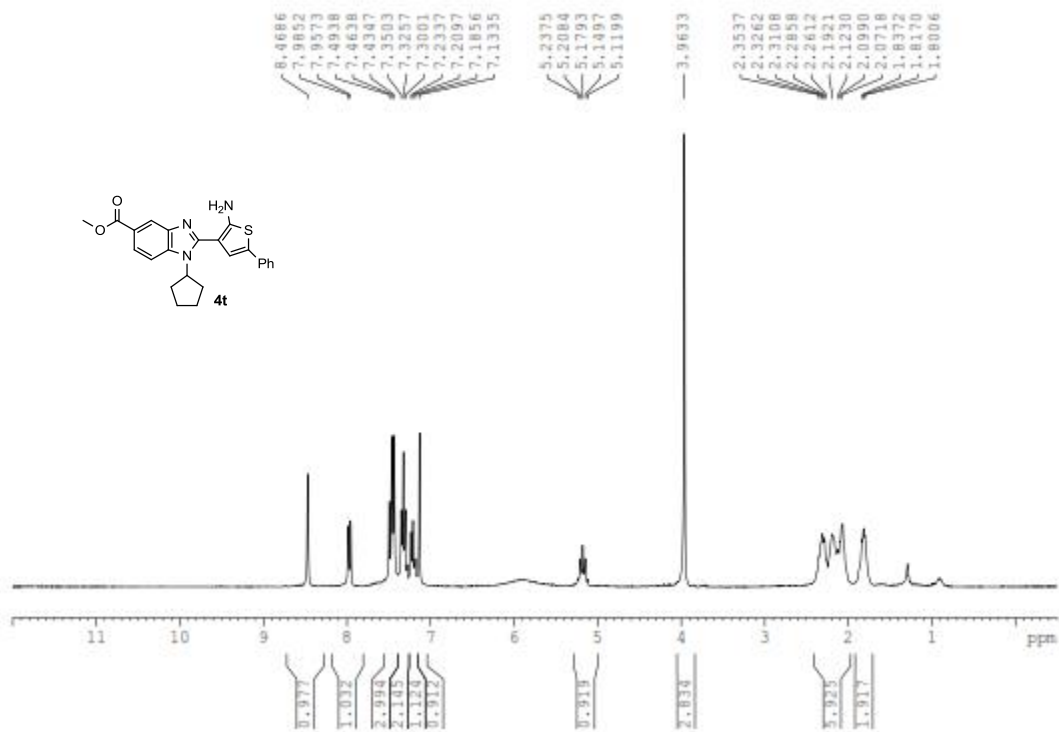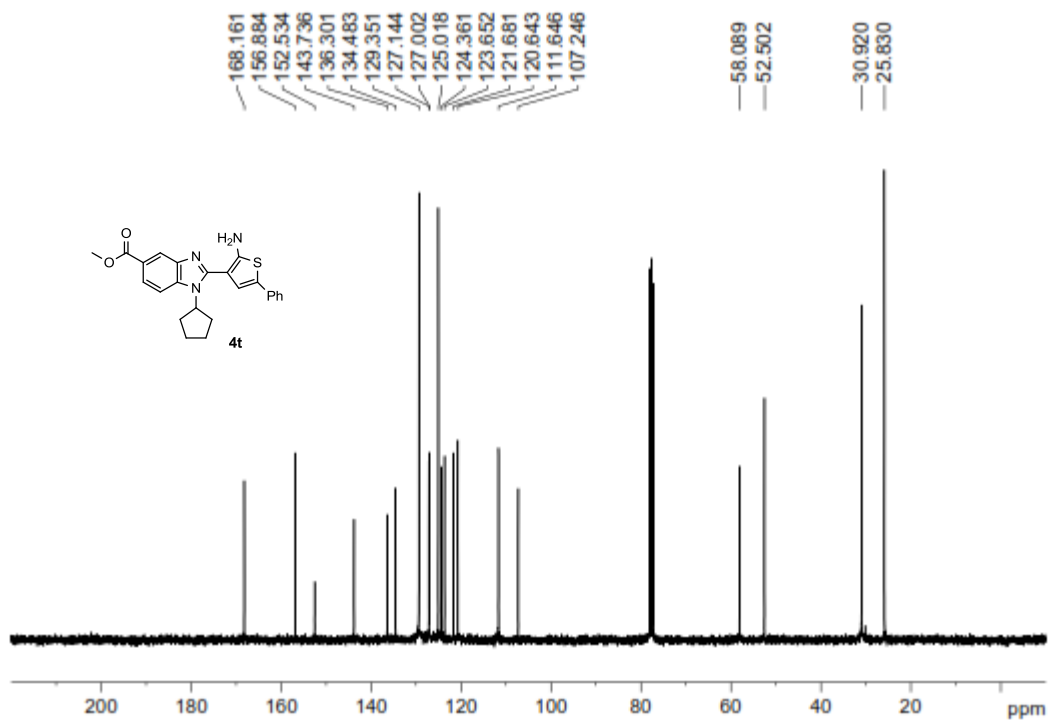

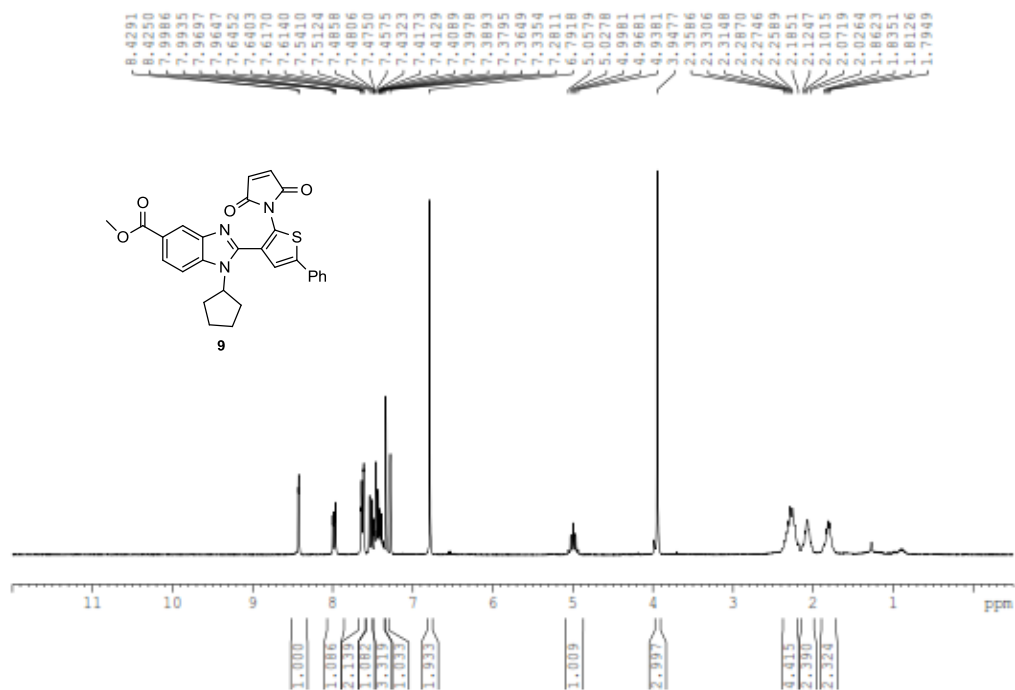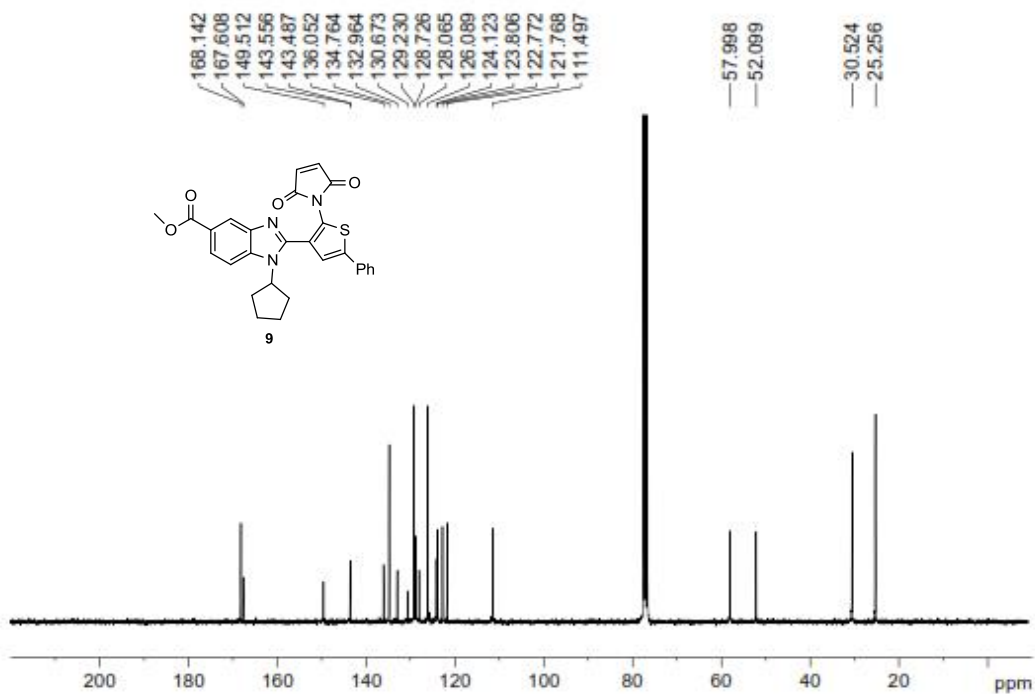

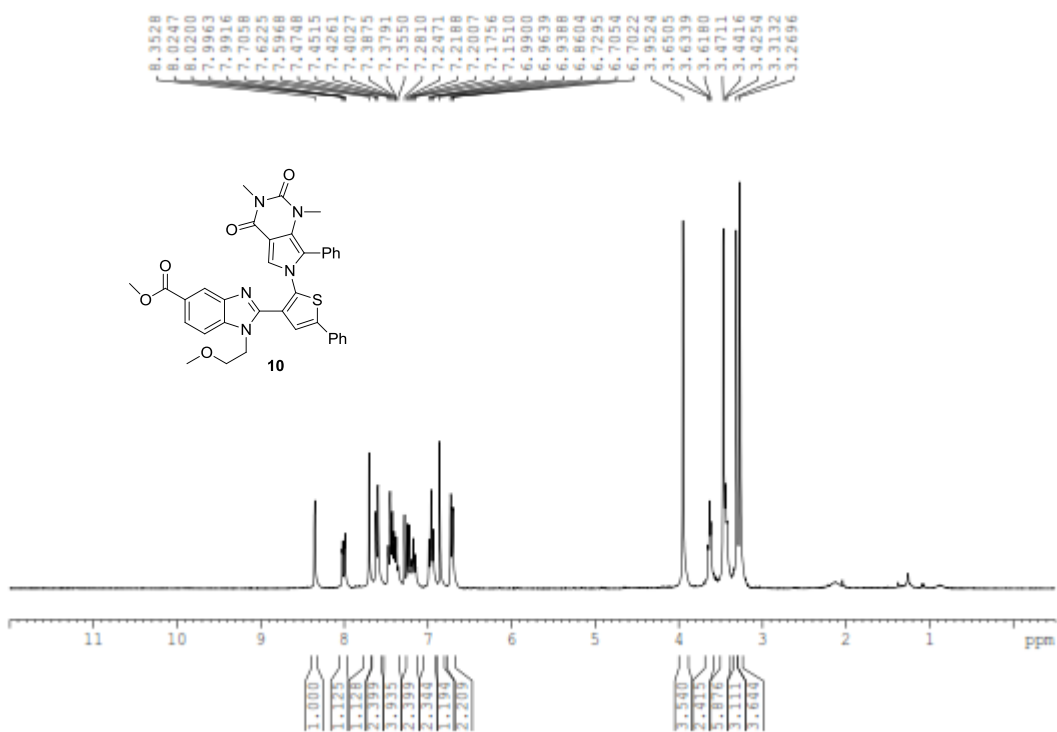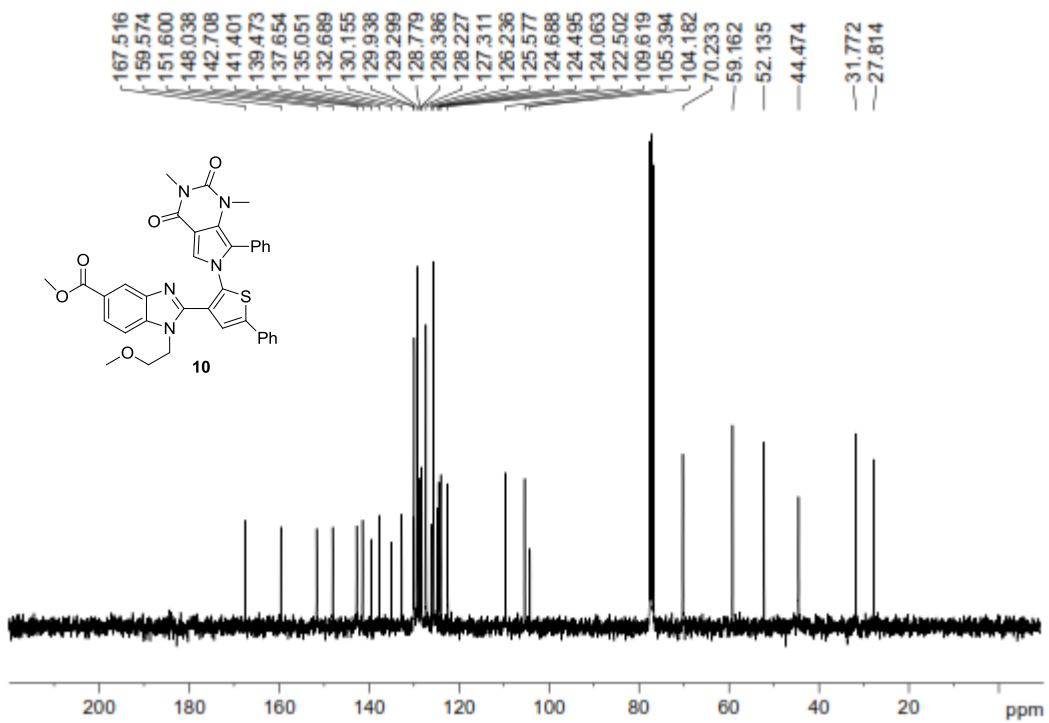

Supplement: c3ra41545g.pdf [file c3ra41545g.pdf]
